# Supplementary material for: Graphene oxide oxidizes stannous ions to synthesize tin sulfide–graphene nanocomposites with small crystal size for high performance lithium ion batteries
Source: Royal Society of Chemistry journal article supplement (doi:10.1039/c2jm34864k), 2012-01-01
Supplement: c2jm34864k.pdf [file c2jm34864k.pdf]

**Graphene oxide oxidizes stannous to synthesize tin  
sulfide-graphene nanocomposites with small crystal size  
for high performance lithium ions batteries**

Ming Zhang, Danni Lei, Xinzhi Yu, Libao Chen, Qihong Li, Yanguo Wang,  
Taihong Wang,\* Guozhong Cao\*

Dr. Ming Zhang, Danni Lei, Xinzhi Yu, Prof. Libao Chen, Prof. Qihong Li, Prof.  
Yanguo Wang, Prof. Taihong Wang

Key Laboratory for Micro-Nano Optoelectronic Devices of Ministry of Education and  
State Key Laboratory for Chemo/Biosensing and Chemometrics

Hunan University

Changsha, 410082, China

E-mail: [thwang@iphy.ac.cn](mailto:thwang@iphy.ac.cn)

Dr. Ming Zhang, Prof. Guozhong Cao

Department of Materials Science and Engineering

University of Washington

Seattle, Washington 98195, United States

E-mail: [gzcao@u.washington.edu](mailto:gzcao@u.washington.edu)

## Supporting Information

---

### I Experimental Section

Graphite powders were purchased from Alfa Aesar China (Tianjin) Co. Ltd., with an average particle diameter of 47  $\mu\text{m}$ . All other chemicals were of analytical grade and used as received without any purification process. The water was Millipore Milli-Q grade with a resistivity larger than 18  $\text{M}\Omega\text{ cm}^{-1}$ .

Graphene oxide (GO) was prepared from graphite powders according to a modified Hummers' method.<sup>1-2</sup> Exfoliation was carried out by sonicating GO dispersion (2 mg/mL) under ambient condition for 2 h. To synthesize  $\text{SnS}_x$ -graphene ( $\text{SnS}_x\text{-G}$ ) nanocomposites, we prepared a mixture of GO, tin dichloride and thiourea with concentrations of 0.5 mg/mL, 15 mM and 60 mM, respectively. Secondly, the flask was then purged with  $\text{N}_2$  for 30 min to eliminate oxygen in the mixture. Thirdly, above suspension was transferred into a Teflon-lined stainless steel autoclave and maintained at 453 K for 12 h. After that, the autoclave was cooled to room temperature naturally and the products were washed with ethanol and distilled water for several times, following dried in oven at 333 K for 12 h. They were noted as  $\text{SnS}_x\text{-G}$ . As a comparison, in a control experiment, the mixture without GO was processed at the same condition for 12 h. After washed by ethanol and distilled water, the final sample was collected and marked as  $\text{SnS}_x\text{-1}$ .

To obtain pure graphene sheets (GSs),  $\text{SnS}_x\text{-G}$  were processed by HCl (0.1 M) to remove  $\text{SnS}_x$ . After washed repeatedly with deionized water and isolated by centrifugation, GSs were dried at 353 K for 12 h.

### Supporting Information

---

The composites were characterized by a powder X-ray diffraction (XRD) on SIEMENS D5000 X-ray diffractometer with Cu K $\alpha$  irradiation ( $\lambda=0.15406$  nm). The microstructure and morphology of composites were analyzed by a Hitachi S4800 scanning electron microscope (SEM), and a JEOL-2010 transmission electron microscope (TEM) at a 200 kV accelerating voltage. Fourier transform infrared (FT-IR) spectra were obtained on a WQF-410 Fourier transform infrared spectrophotometer (Beijing Secondary Optical Instruments, China). Thermogravimetric analysis (TGA) data were achieved on a Netzsch STA449C. Raman spectra were obtained using a confocal microprobe Raman system (LabRam-010, 632 nm as excitation source).

Electrochemical properties of products were measured using CR2016-type coin cells.<sup>3</sup> In a process of fabricating the lithium ion batteries, electrodes were prepared by compressing a mixture of active materials (bare SnS or SnS<sub>x</sub>-G) (80 wt %), carbon black (10 wt %) and carboxyl methyl cellulose (CMC, 10 wt %) on pure copper foils. The mass of active materials on each anode is ca. 0.8 mg. A Celgard 2400 microporous polypropylene membrane was used as a separator. The electrolyte consists of a solution of 1 M LiPF<sub>6</sub> in ethylene carbonate/dimethyl carbonate/diethyl carbonate (1:1:1, in wt %). Pure lithium foils were used as counter electrodes. These cells were assembled in an argon-filled glove-box with water and oxygen contents less than 1 ppm. The discharge and charge measurements were carried on an Arbin BT2000 system with the cut off potentials being 0.02 V for discharge and 2.5 V for charge.

## II Thermogravimetric analysis

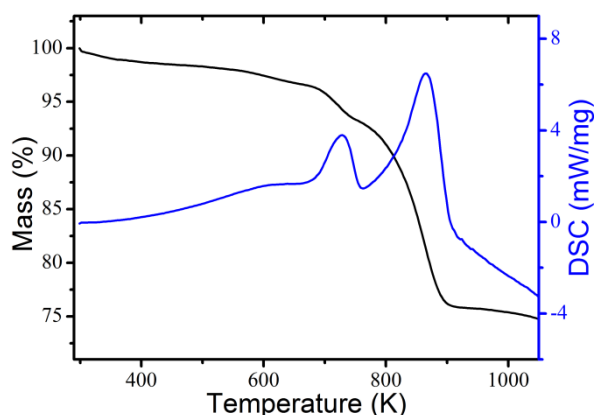

**Figure S1.** TG and DSC curves of SnS<sub>x</sub>-G

TGA measurement was carried out at a heating rate of 10 K min<sup>-1</sup> from 300 to 1050 K with an air flow rate of 10 mL min<sup>-1</sup>. The TGA curve displayed two obvious weight loss stages at about 725 and 864 K. The first one near 725 K could be ascribed to the oxidization of SnS<sub>x</sub>, and the second one could be attributed to the combustion of graphene sheets, which were associated with two exothermic peaks in the differential scanning calorimetry (DSC) curve. The final production of TGA was SnO<sub>2</sub> with a weight ratio of 74.7%. Because of the weight loss during the oxidization tin sulfide, the mass ratio of SnS<sub>x</sub> in composites could be roughly calculated to be about 80%.

### References

1. N. I. Kovtyukhova, P. J. Ollivier, B. R. Martin, T. E. Mallouk, S. A. Chizhik, E. V. Buzaneva, A. D. Gorchinskiy, *Chem. Mater.* 1999, 11, 771.
2. M. Zhang, D. N. Lei, Z. F. Du, X. M. Yin, L. B. Chen, Q. H. Li, Y. G. Wang, T. H. Wang, *J. Mater. Chem.* 2011, 21, 1673.
3. M. Zhang, D. N. Lei, X. M. Yin, L. B. Chen, Q. H. Li, Y. G. Wang, T. H. Wang, *J. Mater. Chem.* 2010, 20, 5538.
